# Supplementary material for: Abrupt meteorological changes reverse thermohaline features in the skin layer
Source: Copernicus journal article supplement (doi:10.5194/egusphere-2025-1307), 2025-03-27
Supplement: Supplementary file [file egusphere-2025-1307-AC1-supplement.pdf]

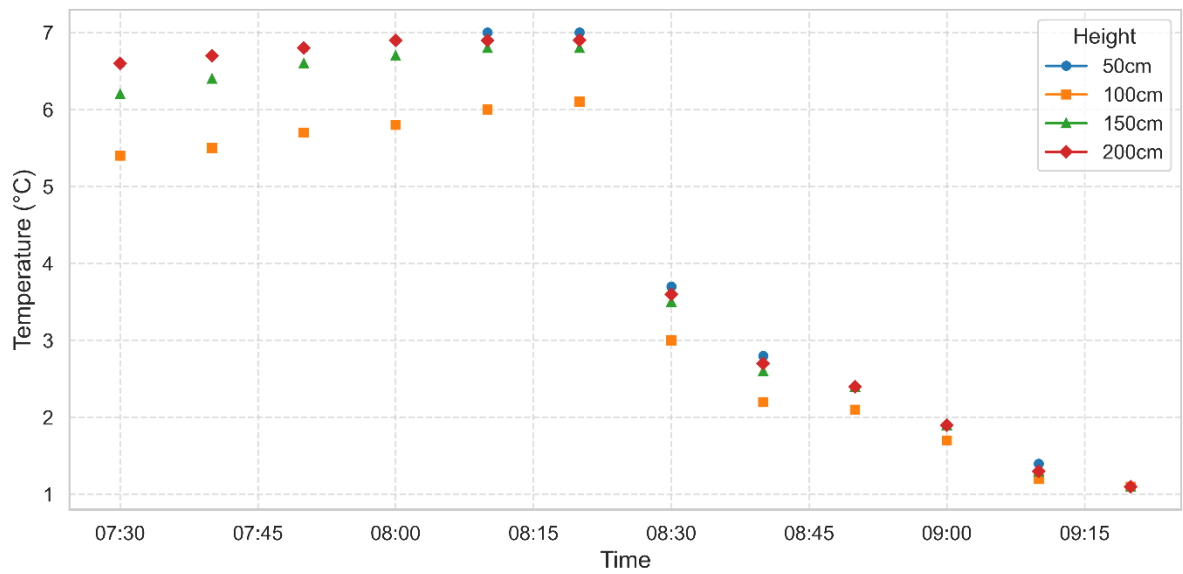

**Dew temperature on 14.03.2023 at several heights above the sea surface.**

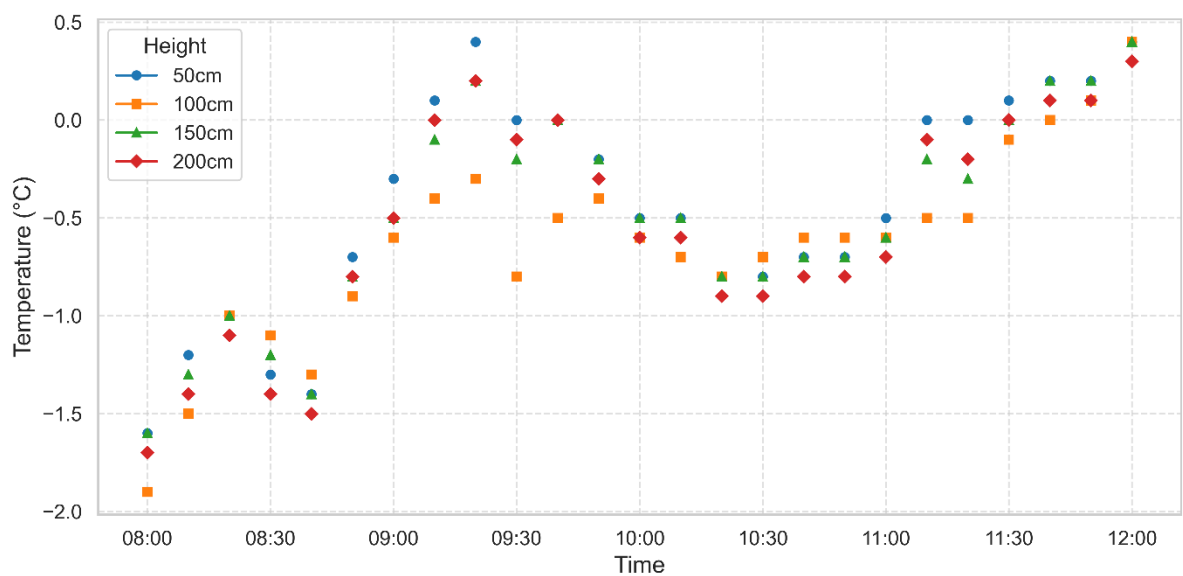

**Dew temperature on 15.03.2023 at several heights above the sea surface.**

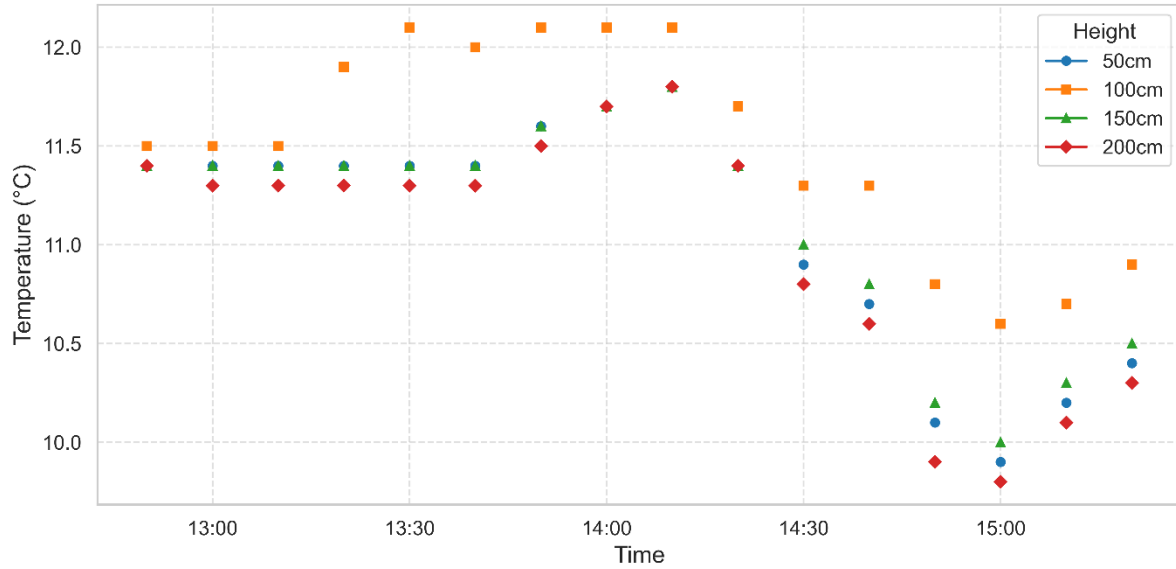

**Dew temperature on 10.10.2022 at several heights above the sea surface.**

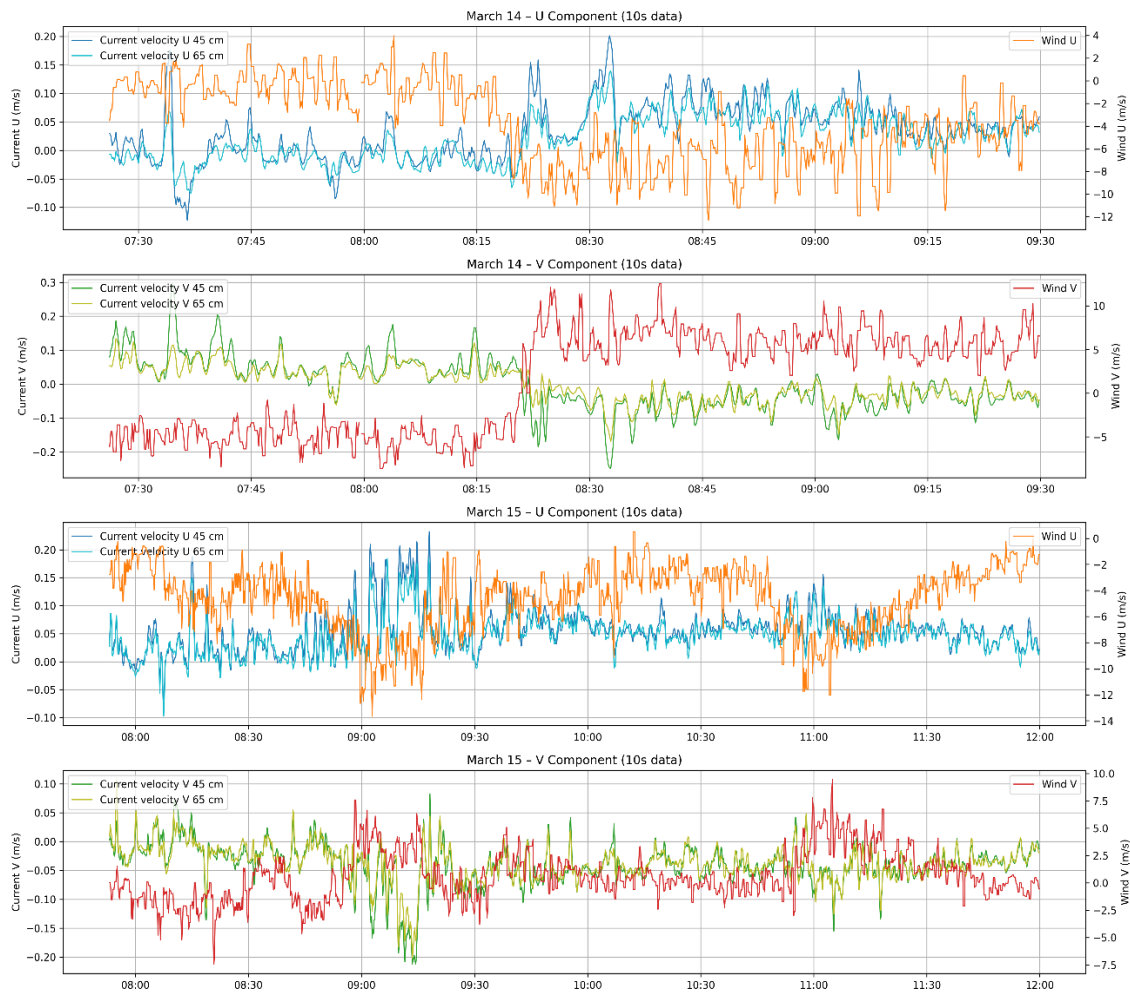

**Time series of current velocity components u and v at 45 cm and 65 cm below the water surface, alongside wind speed, on March 14–15, 2023. Data are shown at 10-second resolution. The left y-axis represents current velocity ( $\text{m s}^{-1}$ ), and the right y-axis represents wind speed ( $\text{m s}^{-1}$ ).**
